# Supplementary material
Source: PubMed Central journal article supplement (PMC8806103)
Supplement: ASN.2021040432SupplementaryData.pdf [file ASN.2021040432SupplementaryData.pdf]

## **Immunogenicity of SARS-CoV-2 Vaccine in Dialysis**

### **Supplement Files Table of Contents**

**Table S1** – Characteristics of maintenance dialysis patients by vaccine received

**Table S2** – Three patients with COVID-19 history and prior antibody results.

Authors: Eduardo Lacson, Jr., M.D., M.P.H.,<sup>1,2</sup> Christos P. Argyropoulos, M.D.,<sup>3</sup> Harold J.

Manley, PharmD,<sup>2</sup> Gideon Aweh, M.S.,<sup>2</sup> Andrew I. Chin, M.D.,<sup>4</sup> Loay H. Salman, M.D., M.B.A.,<sup>5</sup>

Caroline M. Hsu, M.D.,<sup>1</sup> Doug S. Johnson, M.D.,<sup>2</sup> Daniel E. Weiner M.D.<sup>1</sup>

Institutions:

<sup>1</sup> Division of Nephrology, Tufts Medical Center, Boston, Massachusetts

<sup>2</sup> Dialysis Clinic, Inc., Nashville, Tennessee

<sup>3</sup> Division of Nephrology, University of New Mexico School of Medicine, Albuquerque, New Mexico

<sup>4</sup> Division of Nephrology, University of California, Davis School of Medicine, Sacramento, California

<sup>5</sup> Division of Nephrology, Albany Medical College, Albany, New York

Table S1. Characteristics of maintenance dialysis patients by vaccine received.

| Demographics                              | All Patients<br>(N=186) | BNT162b2<br>(Pfizer)<br>N=168 | mRNA-1273<br>(Moderna)<br>N=18 |
|-------------------------------------------|-------------------------|-------------------------------|--------------------------------|
| COVID Vaccine Response                    | 165 (88.7)              | 148 (88.1)                    | 17 (94.4)                      |
| <b>Age (years)</b>                        | 67.9 ± 12.2             | 67.6 ± 12.3                   | 71.2 ± 10.6                    |
| <55                                       | 29 (15.6)               | 28 (16.7)                     | 1 (5.6)                        |
| 55-64                                     | 34 (18.3)               | 31 (18.5)                     | 3 (16.7)                       |
| 65-74                                     | 71 (38.2)               | 64 (38.1)                     | 7 (38.9)                       |
| 75+                                       | 52 (28.0)               | 45 (26.8)                     | 7 (38.9)                       |
| <b>Female</b>                             | 88 (47.3)               | 77 (45.8)                     | 11 (61.1)                      |
| <b>Race</b>                               |                         |                               |                                |
| White                                     | 73 (39.3)               | 64 (38.1)                     | 9 (50.0)                       |
| Black                                     | 39 (21.0)               | 34 (20.2)                     | 5 (27.8)                       |
| Native American                           | 33 (17.7)               | 30 (17.9)                     | 3 (16.7)                       |
| Asian/Pacific Islander                    | 19 (10.2)               | 19 (11.3)                     | 0 (0.0)                        |
| Other/Unknown                             | 22 (11.8)               | 21 (12.5)                     | 1 (5.6)                        |
| <b>Hispanic</b>                           | 15 (8.1)                | 15 (8.9)                      | 0 (0.0)                        |
| <b>Vintage (months)</b>                   | 58.1 ± 54.3             | 58.4 ± 54.9                   | 55.5 ± 50.3                    |
| <b>Body Mass Index (kg/m<sup>2</sup>)</b> | 28.7 ± 7.1              | 28.8 ± 7.3                    | 28.2 ± 5.7                     |
| <b>Long Term Care Facility Resident</b>   | 48 (25.8)               | 40 (23.8)                     | 8 (44.4)                       |
| <b>Modality</b>                           |                         |                               |                                |
| In-Center Hemodialysis                    | 180 (96.8)              | 164 (97.6)                    | 16 (88.9)                      |
| Peritoneal Dialysis                       | 5 (2.7)                 | 3 (1.8)                       | 2 (11.1)                       |
| Home Hemodialysis                         | 1 (0.5)                 | 1 (0.6)                       | 0 (0.0)                        |
| <b>Adequate Dialysis Dose<sup>p</sup></b> | 174 (93.6)              | 158 (94.1)                    | 16 (88.9)                      |
| <b>Serum Albumin (g/dl)</b>               | 3.8 ± 0.4               | 3.8 ± 0.4                     | 3.8 ± 0.5                      |
| <b>Other Vaccines within 14 days</b>      | 20 (10.8)               | <b>15 (8.9)</b>               | <b>5 (27.8)<sup>a</sup></b>    |
| Pneumococcal                              | 4 (2.2)                 | <b>2 (1.2)</b>                | <b>2 (11.1)<sup>a</sup></b>    |
| Hepatitis B                               | 17 (9.1)                | <b>13 (7.7)</b>               | <b>4 (22.2)<sup>a</sup></b>    |
| <b>Potential Immunosuppression</b>        | 36 (19.4)               | 31 (18.5)                     | 5 (27.8)                       |
| Immune-modulating Meds                    | 29 (15.6)               | 24 (14.3)                     | 5 (27.8)                       |
| Prior Transplant                          | 11 (5.9)                | 11 (6.6)                      | 0 (0.0)                        |
| Immunodeficiency Disorder                 | 10 (5.4)                | 9 (5.4)                       | 1 (5.6)                        |
| <b>Hospitalization within 14 days</b>     | 34 (18.3)               | 31 (18.5)                     | 3 (16.7)                       |
| <b>Disability<sup>c</sup></b>             | 17 (9.1)                | 14 (8.3)                      | 3 (16.7)                       |
| <b>Tobacco Use</b>                        | 22 (11.8)               | 21 (12.5)                     | 1 (5.6)                        |
| <b>Alcohol Use Disorder</b>               | 14 (7.5)                | 14 (8.3)                      | 0 (0.0)                        |
| <b>Substance Use Disorder</b>             | 8 (4.3)                 | 7 (4.2)                       | 1 (5.6)                        |
| <b>History of COVID-19</b>                | 38 (20.4)               | 35 (20.8)                     | 3 (16.7)                       |
| <b>Number of Comorbidities</b>            | 3.2 ± 1.9               | 3.2 ± 1.8                     | 3.2 ± 1.9                      |
| <b>Comorbid Conditions</b>                |                         |                               |                                |
| Diabetes Mellitus                         | 129 (69.4)              | 116 (69.1)                    | 13 (72.2)                      |
| Hypertension                              | 152 (81.7)              | 137 (81.6)                    | 15 (83.3)                      |
| Congestive Heart Failure                  | 37 (19.9)               | 33 (19.6)                     | 4 (22.2)                       |

|                                 |           |           |          |
|---------------------------------|-----------|-----------|----------|
| COPD <sup>d</sup>               | 34 (18.3) | 32 (19.1) | 2 (11.1) |
| Stroke/Cerebrovascular Disorder | 23 (12.4) | 20 (11.9) | 3 (16.7) |
| Peripheral Vascular Disease     | 25 (13.4) | 24 (14.3) | 1 (5.6)  |
| Thyroid Disorder                | 36 (19.4) | 32(19.1)  | 4 (22.2) |
| History of Cancer               | 18 (9.7)  | 17 (10.1) | 1 (5.6)  |

Values are presented as mean ± standard deviation or number (percent). <sup>a</sup> P-value<0.05; <sup>b</sup> Adequate dialysis defined by hemodialysis dose spKt/V≥1.2 or peritoneal dialysis dose weekly Kt/V≥1.7; <sup>c</sup> Amputee, wheelchair use or inability to perform activities of daily living; <sup>d</sup> COPD = Chronic Obstructive Pulmonary Disease.

Table S2. Three patients with COVID-19 history and prior antibody results.

| Patient | Days from COVID-19 Diagnosis to Baseline Antibody (Ab) Test | Days from COVID-19 Diagnosis to 1 <sup>st</sup> Vaccine Shot | Results of Baseline Ab Test | Days from 2 <sup>nd</sup> Shot to Post-Vaccine Ab Test | Results of Post-Vaccine Ab Test |
|---------|-------------------------------------------------------------|--------------------------------------------------------------|-----------------------------|--------------------------------------------------------|---------------------------------|
| #1      | 234                                                         | 242                                                          | 20 U/L                      | 22                                                     | 20 U/L                          |
| #2      | 291*                                                        | 286                                                          | 20 U/L                      | 19                                                     | 20 U/L                          |
| #3      | 300*                                                        | 295                                                          | 3.61 U/L                    | 19                                                     | 20 U/L                          |

\* Pseudo-baseline test result: drawn 5 days after the first vaccine dose.
